# Supplementary material for: Health Assessment and the Right to Health in Sweden: Asylum Seekers’ Perspectives
Source: PubMed Central journal article supplement (PMC5010180; doi:10.1371/journal.pone.0161842), 2016-09-02
Supplement: pone.0161842.s002.pdf [file pone.0161842.s002.pdf]

Hi!

**Do you want to participate in a study?**

This study is about the right to health for immigrants in Sweden. It is aimed to persons who recently have come here and probably have been invited to a free health examination. We want to know what you think about the health examination and your experience of it, if you had one done.

The objective of the study is to highlight your perceptions and experiences of the health examination and the Swedish health care system.

You can participate in the study by answering this questionnaire. Participation is voluntary, but your opinion is important in order to improve health examinations and to get more people attending the examination.

No personal information that may reveal your identity is requested. Your answers will be grouped with those of other participants, in order to secure secrecy.

If you do not understand a question, ask for support from the person in charge of the survey. If you consider a question to be sensitive and that you do not want to answer it, you may just leave it behind and go to the next question.

Finally, we want to emphasise that your participation is very important and that your contribution will make this study more valuable. If you still do not want to participate in the study; please, return the questionnaire to the person in charge.

Thanks a lot for your collaboration.

Best regards,

Lubin Lobo

## HEALTH EXAMINATIONS AND THE RIGHT TO HEALTH OF IMMIGRANTS RECENTLY ARRIVED

### Instructions:

**Your answers will be scanned in a machine. For that reason we ask you:**

- Use a blue or black pen, NOT a pencil
- Mark your answers with an X, in this way:  but not like in this:
- If you want to change an answer, fill the box that went wrong:  and make a new X in the right one.:
- Write numbers clearly when requested. Write only one number in each box, like this:  

|   |   |   |   |
|---|---|---|---|
| 1 | 2 | 3 | 4 |
|---|---|---|---|
- Write clear texts in the indicated boxes when explanations are requested or when you want to provide additional information.
- Please, do not write out side of the boxed.

## HEALTH EXAMINATIONS AND THE RIGHT TO HEALTH OF IMMIGRANTS RECENTLY ARRIVED

### Initially some questions about you and your background

1. In what year were you born?

In 19

2. Are you a woman or a man?

Woman  Man

3. In which country were you born?

Somalia  Afghanistan  Iraq  
 Syria  Eritrea  Thailand  
 In another country. Which one?

4. What year did you come to Sweden?

Year

5. When did you obtain residence permission in Sweden?

Year

6. What is your civil status?

Married  Living with partner  Singel  
 Divorced  Widow(er)

7. Do you have children?

Yes, and they live in Sweden  
 Yes but they live in another country  
 No, I do not have children

8. What level of education do you have?

None  
 1 – 6 years (Primary school)  
 7-12 years (Secondary school)  
 more than 12 years (High school /University)  
 Other kind of education, what?

**9. What is your religion?**

- I am not a religious person
- I am a Muslim
- I am a Christian
- I am a Buddhist
- I have another religion. Which?

**10. For what reason did you come to Sweden?**

- To apply for asylum.
- To live with my parents/ family who came earlier to apply for asylum here.
- To live with / marry a Swede
- To live with / marry a non-Swedish European living in Sweden
- To work in Sweden
- For another reason, what?

**Questions about the life in your home country**

This questions help us to understand how you lived **the last year** in your home country.

**11. What did you mainly do during the last year in your home country?**

Mark only one alternative.

- I worked
- I did domestic work
- I was unemployed
- I did something else, what?
- I studied
- I was a farmer

**12. Did you and your family have enough money ...**

Mark the alternative that best applies to you in each line.

|                                            | Yes, always              | Yes, sometimes           | Yes, sometimes           |
|--------------------------------------------|--------------------------|--------------------------|--------------------------|
| a. To buy food?                            | <input type="checkbox"/> | <input type="checkbox"/> | <input type="checkbox"/> |
| b. To pay school fee and school materials? | <input type="checkbox"/> | <input type="checkbox"/> | <input type="checkbox"/> |
| c. To pay for health care?                 | <input type="checkbox"/> | <input type="checkbox"/> | <input type="checkbox"/> |

**13. How often did you go to consult a doctor (or a nurse), during the last year in your home country?**

- Never
- In one occasion
- More than one occasion

**14. Did you or your family suffered from violence or threats in your home country?**

- Yes
- No
- I do not know

**15. Did you come to Sweden with your family?**

- Yes, I came here with my family.
- Yes, I came here with some members of my family.
- No, I came here alone.

+ **Questions about your first period in Sweden** +

**16. How did you mainly live during the first six months in Sweden?**

Mark only one alternative.

- With other asylum seekers (in a special place for refugees and asylum seekers)
- With other unaccompanied children (in an institutions or special place for these children)
- With family or relatives (at their place)
- With friends från my country
- With other persons, who:

**17. During your first six months in Sweden...**

Mark the alternative that best applies to you in each line.

|                                                                                                                                              | Yes, always              | Yes, sometimes           | No, never                |
|----------------------------------------------------------------------------------------------------------------------------------------------|--------------------------|--------------------------|--------------------------|
| a. Did you have someone who could help with, e.g. contacts with authorities, addresses/find places, translate texts or explain instructions? | <input type="checkbox"/> | <input type="checkbox"/> | <input type="checkbox"/> |
| b. Did you have someone to talk to about your feelings or personal problems?                                                                 | <input type="checkbox"/> | <input type="checkbox"/> | <input type="checkbox"/> |
| c. Did you feel alone or isolated?                                                                                                           | <input type="checkbox"/> | <input type="checkbox"/> | <input type="checkbox"/> |

**18. a. How was your health during the first three months in Sweden?**

- Very well
- Well
- Not well, nor bad
- Bad
- Very bad

**b. Did you need some kind of medical care during the first three months in Sweden?**

- Yes
- No → Move to question 19
- I do not remember → Move to question 19

**c. If you answered Yes, what kind of medical care did you need?**

- Due to pregnancy
- Due to flu
- Due to chronic disease (e.g. Diabetes)
- Due to other illness or injury
- Due to mental disease (e.g. anxiety, depression)
- Due to an infection (e.g. tuberculosis (TB), HIV/AIDS, Hepatitis)
- For another reason, which?
- I do not know

**d. Did you get some treatment or care?**

- Yes
- No
- I do not know

**19. Your ideas about health**

*Mark the alternative in each line that best applies to you.*

|                                                                             | Agree                    | Disagree                 | I don't know             |
|-----------------------------------------------------------------------------|--------------------------|--------------------------|--------------------------|
| a. I can feel bad even if I do not have any disease                         | <input type="checkbox"/> | <input type="checkbox"/> | <input type="checkbox"/> |
| b. A person can be sick but feel OK.                                        | <input type="checkbox"/> | <input type="checkbox"/> | <input type="checkbox"/> |
| c. I can do nothing to influence my own health.                             | <input type="checkbox"/> | <input type="checkbox"/> | <input type="checkbox"/> |
| d. God decides about my sickness or health.                                 | <input type="checkbox"/> | <input type="checkbox"/> | <input type="checkbox"/> |
| e. What I do and how I live have an impact on my health                     | <input type="checkbox"/> | <input type="checkbox"/> | <input type="checkbox"/> |
| f. To see a doctor and getting medicines are most important when I am sick. | <input type="checkbox"/> | <input type="checkbox"/> | <input type="checkbox"/> |
| g. I prefer other alternatives than doctors and medicines when I am sick    | <input type="checkbox"/> | <input type="checkbox"/> | <input type="checkbox"/> |
| h. Illness can be a consequence of sin, magic or evil spirits.              | <input type="checkbox"/> | <input type="checkbox"/> | <input type="checkbox"/> |

**20. Your perceptions about the health care**

*Mark the alternative in each line that best applies to you.*

|                                                                                              | Yes                      | No                       | I don't know             |
|----------------------------------------------------------------------------------------------|--------------------------|--------------------------|--------------------------|
| a. I had better health care services in my country than in Sweden                            | <input type="checkbox"/> | <input type="checkbox"/> | <input type="checkbox"/> |
| b. I cannot get here the medicines that doctors would get me in my country.                  | <input type="checkbox"/> | <input type="checkbox"/> | <input type="checkbox"/> |
| c. I trust more to physicians and nurses in my country than I do here.                       | <input type="checkbox"/> | <input type="checkbox"/> | <input type="checkbox"/> |
| d. I visit a doctor only if I am seriously sick.                                             | <input type="checkbox"/> | <input type="checkbox"/> | <input type="checkbox"/> |
| e. For me, physicians should to be of the same sex as myself                                 | <input type="checkbox"/> | <input type="checkbox"/> | <input type="checkbox"/> |
| f. I avoid talking about sexuality and intimate things, even if the doctor asks me about it. | <input type="checkbox"/> | <input type="checkbox"/> | <input type="checkbox"/> |
| g. I know where to seek care if I get sick.                                                  | <input type="checkbox"/> | <input type="checkbox"/> | <input type="checkbox"/> |
| h. Physicians in Sweden do not understand my health problems.                                | <input type="checkbox"/> | <input type="checkbox"/> | <input type="checkbox"/> |

**21. What source of information is most important for you in relation to food and habits considered good for health?**

- Health care services in Sweden (e.g. doctor, nurse, dietician)
- Health care in your home country
- Schools and other institutions for education in Sweden (e.g. SFI)
- Schools in your home country
- Media (e.g. TV, internet, books, brochures, posters)
- Providers of free time activities (e.g. organizations, associations)
- Relatives and friends
- Other, specify what:

+ **Questions about health examinations** +

These questions are about a health examination that new arrivals are offered for free when they come to Sweden, whether healthy or sick. Usually one is invited to the health examination shortly after arrival in Sweden. At the health examination the doctor or nurse often ask about vaccinations, previous illnesses and doing medical tests.

**22. Have you ever before heard of health examinations for new arrivals?**

- Yes
- No → **Move to question 27**

**23. From whom did you receive information about the health examination?**

*You may mark several alternatives.*

- Swedish Migration Board
- Health care
- Family, relatives or friends
- I found the information myself about the health examination.
- I have not found any information about the health examination. .
- Others, who?

**24. Did you get a letter of invitation to health examination?**

- Yes
- No → **Move to question 27**

**25. a. In what language was the invitation written?**

*You may mark several alternatives..*

- Swedish
- English
- Other language, what?
- Do not know

**b. Did you understand the content?**

- Yes
- Partly
- No
- No, but someone helped me to translate
- I do not remember

**26. What information did you get in the invitation to the health examination?**

Mark the alternative that best applies to you in each line.

|                                                                                                          | Yes                      | No                       | Do not remember          |
|----------------------------------------------------------------------------------------------------------|--------------------------|--------------------------|--------------------------|
| a. The purpose of the health examination                                                                 | <input type="checkbox"/> | <input type="checkbox"/> | <input type="checkbox"/> |
| b. How the health examination is carried out                                                             | <input type="checkbox"/> | <input type="checkbox"/> | <input type="checkbox"/> |
| c. That the health examination is optional                                                               | <input type="checkbox"/> | <input type="checkbox"/> | <input type="checkbox"/> |
| d. How I could find the way to the health center                                                         | <input type="checkbox"/> | <input type="checkbox"/> | <input type="checkbox"/> |
| e. That the result from the health examination will not be communicated with the Swedish Migration Board | <input type="checkbox"/> | <input type="checkbox"/> | <input type="checkbox"/> |

**27. In what way would you prefer to receive the invitation to the health examination?**

- Orally
- Written on paper (letter, brochure etc.)
- Written on the Internet.
- By a telephone call
- SMS sent to my mobile phone
- On radio
- In another way, what way?

**28. What do you think the purpose of the health examination is?**

Mark the alternative that best applies to you in each line.

|                                                                                   | Yes                      | No                       | Do not know              |
|-----------------------------------------------------------------------------------|--------------------------|--------------------------|--------------------------|
| a. To check whether I was healthy or sick                                         | <input type="checkbox"/> | <input type="checkbox"/> | <input type="checkbox"/> |
| b. To offer care or treatment if I was sick.                                      | <input type="checkbox"/> | <input type="checkbox"/> | <input type="checkbox"/> |
| c. To identify communicable diseases (e.g. TB, HIV, AIDS, hepatitis)              | <input type="checkbox"/> | <input type="checkbox"/> | <input type="checkbox"/> |
| d. To protect the society from communicable diseases that I may have.             | <input type="checkbox"/> | <input type="checkbox"/> | <input type="checkbox"/> |
| e. To vaccinate and protect me from diseases that might be present in the society | <input type="checkbox"/> | <input type="checkbox"/> | <input type="checkbox"/> |
| f. To identify if I was fit to start to work                                      | <input type="checkbox"/> | <input type="checkbox"/> | <input type="checkbox"/> |
| g. To give me information about health issues                                     | <input type="checkbox"/> | <input type="checkbox"/> | <input type="checkbox"/> |
| h. To prevent diseases.                                                           | <input type="checkbox"/> | <input type="checkbox"/> | <input type="checkbox"/> |

i. Other, What?

**29. Did you undergo the health examination?**

- Yes
- No → **Move on to question 42**



**30. When did you do the health examination?**

- Less than 1 year ago
- Between 1 and 2 year ago
- More than 2 years ago

**31. Where did you do the health examination?**

- Stockholm
- Skåne
- Östergötland
- Norrbotten
- Other place, Where?

**32. Why did you do the health examination?**

*Mark the alternative that best applies to you in each line.*

|                                                        | Yes                      | No                       | I do not know            |
|--------------------------------------------------------|--------------------------|--------------------------|--------------------------|
| a. It was free of cost.                                | <input type="checkbox"/> | <input type="checkbox"/> | <input type="checkbox"/> |
| b. I thought it was compulsory.                        | <input type="checkbox"/> | <input type="checkbox"/> | <input type="checkbox"/> |
| c. I wanted to stay in Sweden                          | <input type="checkbox"/> | <input type="checkbox"/> | <input type="checkbox"/> |
| d. I was pregnant                                      | <input type="checkbox"/> | <input type="checkbox"/> | <input type="checkbox"/> |
| e. I was sick and needed health care.                  | <input type="checkbox"/> | <input type="checkbox"/> | <input type="checkbox"/> |
| f. I wanted to know if I had any disease.              | <input type="checkbox"/> | <input type="checkbox"/> | <input type="checkbox"/> |
| g. I wanted to know if I had any communicable disease. | <input type="checkbox"/> | <input type="checkbox"/> | <input type="checkbox"/> |
| h. I needed to talk with someone regarding my health   | <input type="checkbox"/> | <input type="checkbox"/> | <input type="checkbox"/> |
| i. Other persons recommended the health examination    | <input type="checkbox"/> | <input type="checkbox"/> | <input type="checkbox"/> |

j. Other reason?

**33. What expectations did you have regarding undergoing the health examination?**

*Mark the alternative that best applies to you in each line.*

|                                                  | I agree                  | I disagree               | I do not know            |
|--------------------------------------------------|--------------------------|--------------------------|--------------------------|
| a. It would increase my chance to stay in Sweden | <input type="checkbox"/> | <input type="checkbox"/> | <input type="checkbox"/> |
| b. To get a diagnos.                             | <input type="checkbox"/> | <input type="checkbox"/> | <input type="checkbox"/> |
| c. To get treatment and medicine                 | <input type="checkbox"/> | <input type="checkbox"/> | <input type="checkbox"/> |
| d. I had no particular expectations              | <input type="checkbox"/> | <input type="checkbox"/> | <input type="checkbox"/> |

e. If you had other expectations. What?

**34. Who did the health examination?**

- A doctor
- A nurse
- Both a doctor and a nurse
- Do not know
- Do not remember

**About the communication with the doctor or the nurse.**

**35. When you talked to the doctor or the nurse at the health examination...**

*Mark the alternative that best applies to you in each line.*

|                                                                                                               | Yes                      | Partly                   | No                       | Do not remember          |
|---------------------------------------------------------------------------------------------------------------|--------------------------|--------------------------|--------------------------|--------------------------|
| a. Were you informed on what tests that were done and why?                                                    | <input type="checkbox"/> | <input type="checkbox"/> | <input type="checkbox"/> | <input type="checkbox"/> |
| b. Did you understand the doctor or the nurse?                                                                | <input type="checkbox"/> | <input type="checkbox"/> | <input type="checkbox"/> | <input type="checkbox"/> |
| c. Do you think the doctor or the nurse understood what you were saying?                                      | <input type="checkbox"/> | <input type="checkbox"/> | <input type="checkbox"/> | <input type="checkbox"/> |
| d. Were your questions answered?                                                                              | <input type="checkbox"/> | <input type="checkbox"/> | <input type="checkbox"/> | <input type="checkbox"/> |
| e. Were you satisfied with the answers?                                                                       | <input type="checkbox"/> | <input type="checkbox"/> | <input type="checkbox"/> | <input type="checkbox"/> |
| f. Did you get a chance to express your health concerns in a satisfactory way?                                | <input type="checkbox"/> | <input type="checkbox"/> | <input type="checkbox"/> | <input type="checkbox"/> |
| g. Did you get any advice regarding your health concerns?                                                     | <input type="checkbox"/> | <input type="checkbox"/> | <input type="checkbox"/> | <input type="checkbox"/> |
| h. Did you get any treatment or medicine?                                                                     | <input type="checkbox"/> | <input type="checkbox"/> | <input type="checkbox"/> | <input type="checkbox"/> |
| i. Was there anything you had wanted to talk about during the health examination but did not get a chance to? | <input type="checkbox"/> | <input type="checkbox"/> | <input type="checkbox"/> | <input type="checkbox"/> |

j. If **yes** on the last question, what?

**About the content of the health examination**

**36. During the health examination...**

*Mark the alternative that best applies to you in each line.*

|                                                           | Yes                      | No                       | Do not remember          | Do not know              |
|-----------------------------------------------------------|--------------------------|--------------------------|--------------------------|--------------------------|
| a. Did the doctor or the nurse do a physical examination? | <input type="checkbox"/> | <input type="checkbox"/> | <input type="checkbox"/> | <input type="checkbox"/> |
| b. Was any medical tests done?                            | <input type="checkbox"/> | <input type="checkbox"/> | <input type="checkbox"/> | <input type="checkbox"/> |
| c. Did you get information on what tests that were done?  | <input type="checkbox"/> | <input type="checkbox"/> | <input type="checkbox"/> | <input type="checkbox"/> |
| d. Did you get information on why the tests were done?    | <input type="checkbox"/> | <input type="checkbox"/> | <input type="checkbox"/> | <input type="checkbox"/> |
| e. Did you get the results?                               | <input type="checkbox"/> | <input type="checkbox"/> | <input type="checkbox"/> | <input type="checkbox"/> |

+ **Interpreters**

An interpreter is a person who helps with translations when the patient does not speak the same language as the doctor or the nurse.

**37. a. Did you have an interpreter at your health examination?**

- Yes
- No

—————> **Move on to question 38**

**b. Were the interpreter present in the clinic or on the telephone?**

- In the clinic
- On the telephone

**c. Did you know the interpreter?**

- Yes, the interpreter was a relative
- Yes, the interpreter was a friend
- No, I did not know the interpreter

**d. What would you prefer?**

- An interpreter that I know
- An interpreter that I do not know.
- Either, it does not matter

**e. Was the interpreter of the same sex as you?**

- Yes
- No
- I do not know

**f. Do you think the interpreter ought to be of the same sex as you?**

- Yes
- No
- Either, it does not matter

**g. Did you trust the interpreter to translate what you said in a correct way?**

- Yes
- No

**h. How did it work to communicate using an interpreter?**

- It worked well
- Not well, nor bad
- Bad
- Do not know

**i. What do you think is the best?**

- To have the interpreter in the room at the health examination
- To have the interpreter via the telephone

**38. Did the doctor or the nurse explain to you any of the following?**

*Mark the alternative that best applies to you in each line.*

|                                                                                                            | Yes                      | No                       | Do not remember          |
|------------------------------------------------------------------------------------------------------------|--------------------------|--------------------------|--------------------------|
| a. That only asylum seekers have the right to the health examination.                                      | <input type="checkbox"/> | <input type="checkbox"/> | <input type="checkbox"/> |
| b. That it is optional to undergo the health examination.                                                  | <input type="checkbox"/> | <input type="checkbox"/> | <input type="checkbox"/> |
| c. That adult asylum seekers have limited access to health care in Sweden.                                 | <input type="checkbox"/> | <input type="checkbox"/> | <input type="checkbox"/> |
| d. Those asylum seekers under the age of 18 have the same right to health care as all children in Sweden.  | <input type="checkbox"/> | <input type="checkbox"/> | <input type="checkbox"/> |
| e. What service you may get from the health care.                                                          | <input type="checkbox"/> | <input type="checkbox"/> | <input type="checkbox"/> |
| f. Where you can get health care service if you get sick.                                                  | <input type="checkbox"/> | <input type="checkbox"/> | <input type="checkbox"/> |
| g. Where you may get help if you are feeling very sad, stressed or not being able to sleep.                | <input type="checkbox"/> | <input type="checkbox"/> | <input type="checkbox"/> |
| h. How you protect yourself (or your partner) from an unwanted pregnancy.                                  | <input type="checkbox"/> | <input type="checkbox"/> | <input type="checkbox"/> |
| i. How you protect yourself from sexually transmitted infections (e.g. HIV/AIDS, Chlamydia och gonorrhoea) | <input type="checkbox"/> | <input type="checkbox"/> | <input type="checkbox"/> |
| j. How to act to reduce the risk to get TB.                                                                | <input type="checkbox"/> | <input type="checkbox"/> | <input type="checkbox"/> |

**39. Your reflection from having done the health examination...**

*Mark the alternative that best applies to you in each line.*

|                                                                                | Yes                      | Partly                   | No                       | Do not remember          |
|--------------------------------------------------------------------------------|--------------------------|--------------------------|--------------------------|--------------------------|
| a. Did the health examination make you feel better?                            | <input type="checkbox"/> | <input type="checkbox"/> | <input type="checkbox"/> | <input type="checkbox"/> |
| b. Did you get information that make you feel better and prevent disease?      | <input type="checkbox"/> | <input type="checkbox"/> | <input type="checkbox"/> | <input type="checkbox"/> |
| c. Did you trust the person who carried out the health examination?            | <input type="checkbox"/> | <input type="checkbox"/> | <input type="checkbox"/> | <input type="checkbox"/> |
| d. Did the health examination correspond to your expectations?                 | <input type="checkbox"/> | <input type="checkbox"/> | <input type="checkbox"/> | <input type="checkbox"/> |
| e. Are you over all satisfied with the health examination?                     | <input type="checkbox"/> | <input type="checkbox"/> | <input type="checkbox"/> | <input type="checkbox"/> |
| f. Do you think that the doctor or nurse treated you in a respectful manner?   | <input type="checkbox"/> | <input type="checkbox"/> | <input type="checkbox"/> | <input type="checkbox"/> |
| g. Did you feel insulted or derogated in connection to the health examination? | <input type="checkbox"/> | <input type="checkbox"/> | <input type="checkbox"/> | <input type="checkbox"/> |

h. If **yes** on the last question, in what way;

40. **If you were treated well and satisfied with the health examination → Move to 41**

**If you were not treated in a good or respectful way at the health examination, what do you think was the reason to this?**

*Mark the alternative that best applies to you in each line.*

|                                       | Yes                      | No                       | Do not know/ no opinion  |
|---------------------------------------|--------------------------|--------------------------|--------------------------|
| a. My language problems / limitations | <input type="checkbox"/> | <input type="checkbox"/> | <input type="checkbox"/> |
| b. My nationality or ethnic identity  | <input type="checkbox"/> | <input type="checkbox"/> | <input type="checkbox"/> |
| c. My sex                             | <input type="checkbox"/> | <input type="checkbox"/> | <input type="checkbox"/> |
| d. My age                             | <input type="checkbox"/> | <input type="checkbox"/> | <input type="checkbox"/> |
| e. For being disable or handicapped   | <input type="checkbox"/> | <input type="checkbox"/> | <input type="checkbox"/> |
| f. My religion                        | <input type="checkbox"/> | <input type="checkbox"/> | <input type="checkbox"/> |
| g. My colour of skin                  | <input type="checkbox"/> | <input type="checkbox"/> | <input type="checkbox"/> |
| h. My sexual orientation              | <input type="checkbox"/> | <input type="checkbox"/> | <input type="checkbox"/> |

h. Other reason;

**41. After the health examination, I feel...**

- More positive towards the health examination than before.
- More negative towards the health examination than before.
- Whether more positive or negative

+ If you did the health examination, go directly to question 44

+

**To you who did NOT do the health examination**

**42. Why did you not do the health examination?**

*Mark the alternative that best applies to you in each line.*

|                                                                                       | Agree                    | Do not agree             | Do not know              |
|---------------------------------------------------------------------------------------|--------------------------|--------------------------|--------------------------|
| a. I was not a asylum seeker                                                          | <input type="checkbox"/> | <input type="checkbox"/> | <input type="checkbox"/> |
| b. I had never heard about the health examination                                     | <input type="checkbox"/> | <input type="checkbox"/> | <input type="checkbox"/> |
| c. I have not received a letter or invitation                                         | <input type="checkbox"/> | <input type="checkbox"/> | <input type="checkbox"/> |
| d. I received an invitation but did not want to go                                    | <input type="checkbox"/> | <input type="checkbox"/> | <input type="checkbox"/> |
| e. I did not understand what the health examination was                               | <input type="checkbox"/> | <input type="checkbox"/> | <input type="checkbox"/> |
| f. I thought the health examination may have negative effect on my asylum application | <input type="checkbox"/> | <input type="checkbox"/> | <input type="checkbox"/> |
| g. I thought I would not get the medicines I needed                                   | <input type="checkbox"/> | <input type="checkbox"/> | <input type="checkbox"/> |
| h. I do not like to talk about my health problems och difficulties                    | <input type="checkbox"/> | <input type="checkbox"/> | <input type="checkbox"/> |
| i. I felt healthy                                                                     | <input type="checkbox"/> | <input type="checkbox"/> | <input type="checkbox"/> |
| j. I am afraid of syringes and injections                                             | <input type="checkbox"/> | <input type="checkbox"/> | <input type="checkbox"/> |
| k. I have bad experiences from contacts with the Swedish Migration Board              | <input type="checkbox"/> | <input type="checkbox"/> | <input type="checkbox"/> |
| l. I have bad experiences from contacts with doctors and nurses in Sweden             | <input type="checkbox"/> | <input type="checkbox"/> | <input type="checkbox"/> |
| m. I was afraid that I had a dangerous disease                                        | <input type="checkbox"/> | <input type="checkbox"/> | <input type="checkbox"/> |
| n. I did not want to know that I had HIV/AIDS                                         | <input type="checkbox"/> | <input type="checkbox"/> | <input type="checkbox"/> |
| o. I was afraid for what others might say if I had HIV/AIDS                           | <input type="checkbox"/> | <input type="checkbox"/> | <input type="checkbox"/> |
| p. I did not want to know if I had tuberculosis (TB)                                  | <input type="checkbox"/> | <input type="checkbox"/> | <input type="checkbox"/> |
| q. I was afraid for what others might say if I had tuberculosis (TB)                  | <input type="checkbox"/> | <input type="checkbox"/> | <input type="checkbox"/> |
| r. I have heard negative comments on the health examination                           | <input type="checkbox"/> | <input type="checkbox"/> | <input type="checkbox"/> |
| s. I was afraid for having to leave Sweden if I was seriously sick                    | <input type="checkbox"/> | <input type="checkbox"/> | <input type="checkbox"/> |
| t. Because others I know had not done the health examination                          | <input type="checkbox"/> | <input type="checkbox"/> | <input type="checkbox"/> |

u. Other reason;

**43. Do you think of any negative effect by not having done the health examination?**

- Yes. If so, what?
- No
- Do not know

+

+

**44. Would you recommend other persons to do the health examination?**

- Yes
- No
- No opinion

**Questions regarding your present health status**

**45. How do you perceive your general health condition during the last three months in Sweden?**

- Very good
- Good
- Not good, nor bad
- Bad
- Very bad

**46. How do you perceive your general health condition in comparison with others in your own age?**

- Better
- Worse
- About the same

**47. Have you during the last three months been in need for a doctor or seeking health care, but refrained from doing so?**

- Yes
  - No
- ↓ → **Go to question 49**

**48. Why did you not go to see a doctor?**

- My problems disappeared
- Too long waiting time
- Difficult to get in contact by the telephone
- Negative experiences from before
- I did not know where to go or who to ask
- For economic reasons
- I did not have the time to go
- Because of language difficulties
- Other reason, what?

**49. How did you answer the questionnaire?**

- I have read by myself and answered the questions in written.
- Someone read the questions for me and I have then answered the questions in written.
- Someone read the questions for me and also written the answers according to what I told.

**50. Where did you answer the questionnaire?**

- In Stockholm county
- In Norrbottens county
- In Östergötlands county
- In Skåne county

**51. Do you have any comments to add?**

**Thank you very much for your cooperation!**
